# Supplementary material
Source: PubMed Central journal article supplement (PMC2944013)
Supplement: NIHMS212128-supplement-1.pdf [file NIHMS212128-supplement-1.pdf]

Supplementary Table 1. Association of *RANKL* rs7984870 risk allele and SE copy numbers with younger age at RA onset in

|        |          | WCPR, CLEAR and BRASS RA cohorts |          |                   |          |                   |          |
|--------|----------|----------------------------------|----------|-------------------|----------|-------------------|----------|
| Cohort | Genotype | SE= 0                            |          | SE= 1             |          | SE= 2             |          |
|        |          | Mean ± SD yrs (n)                | <i>p</i> | Mean ± SD yrs (n) | <i>p</i> | Mean ± SD yrs (n) | <i>p</i> |
| WCPR   | SE       | 54.7 ± 11.6 (49)                 |          | 50.6 ± 11.2 (96)  |          | 50.6 ± 11.2 (96)  | 0.07     |
|        | CC       | 58.9 ± 13.4 (8)                  | 0.64     | 44.2 ± 9.8 (16)   | 0.04     | 41.3 ± 18.6 (8)   | 0.32     |
|        | CG       | 53.3 ± 15.1 (22)                 |          | 51.7 ± 11.7 (44)  |          | 50.7 ± 15.0 (20)  |          |
|        | GG       | 54.5 ± 13.6 (19)                 |          | 52.1 ± 11.9 (36)  |          | 50.0 ± 10.6 (18)  |          |
|        | CC       | 58.9 ± 13.4 (8)                  | 0.39     | 44.2 ± 9.8 (16)   | 0.01     | 41.3 ± 18.6 (8)   | 0.15     |
|        | CG+GG    | 53.8 ± 14.3 (41)                 |          | 51.9 ± 11.7 (80)  |          | 50.4 ± 13.0 (38)  |          |
| RF+    | SE       | 42.7 ± 16.1 (93)                 |          | 39.3 ± 13.5 (141) |          | 40.9 ± 13.1 (83)  | 0.22     |
|        | CC       | 44.9 ± 13.3 (12)                 | 0.8      | 35.7 ± 13.2 (35)  | 0.14     | 37.5 ± 11.3 (17)  | 0.59     |
|        | CG       | 42.2 ± 16.6 (40)                 |          | 39.5 ± 13.2 (57)  |          | 41.9 ± 12.1 (40)  |          |
|        | GG       | 42.6 ± 16.7 (41)                 |          | 41.7 ± 13.7 (49)  |          | 41.5 ± 15.7 (26)  |          |
|        | CC       | 44.9 ± 13.3 (12)                 | 0.55     | 35.7 ± 13.2 (35)  | 0.07     | 37.5 ± 11.3 (17)  | 0.32     |
|        | CG+GG    | 42.4 ± 16.7 (81)                 |          | 40.5 ± 13.4 (106) |          | 41.7 ± 13.5 (66)  |          |
| CLEAR  | SE       | 49.0 ± 16.2 (113)                |          | 48.7 ± 13.5 (74)  |          | 45.4 ± 11.1 (18)  | 0.55     |
|        | CC       | 48.8 ± 10.2 (26)                 | 0.69     | 41.5 ± 11.9 (19)  | 0.06     | 46.5 ± 4.3 (6)    | 0.67     |
|        | CG       | 48.3 ± 14.1 (55)                 |          | 50.9 ± 13.1 (39)  |          | 44.0 ± 16.8 (12)  |          |
|        | GG       | 51.5 ± 13.2 (26)                 |          | 48.9 ± 13.9 (23)  |          | 51.2 ± 11.4 (3)   |          |
|        | CC       | 48.8 ± 10.2 (26)                 | 0.85     | 41.5 ± 11.9 (19)  | 0.03     | 46.5 ± 4.3 (6)    | 0.93     |
|        | CG+GG    | 49.2 ± 13.4 (81)                 |          | 50.1 ± 13.3 (62)  |          | 45.5 ± 15.7 (15)  |          |
| ACPA+  | SE       | 43.9 ± 15.8 (94)                 |          | 39.1 ± 13.3 (154) |          | 39.9 ± 14.0 (96)  | 0.04     |
|        | CC       | 43.1 ± 11.9 (16)                 | 0.79     | 35.6 ± 13.0 (35)  | 0.13     | 36.9 ± 12.8 (20)  | 0.67     |
|        | CG       | 43.2 ± 16.1 (37)                 |          | 39.1 ± 12.8 (65)  |          | 40.6 ± 13.6 (47)  |          |
|        | GG       | 44.9 ± 17.1 (41)                 |          | 41.5 ± 13.6 (54)  |          | 40.8 ± 15.4 (29)  |          |
|        | CC       | 43.1 ± 11.9 (16)                 | 0.81     | 35.6 ± 13.0 (35)  | 0.06     | 36.9 ± 12.8 (20)  | 0.38     |
|        | CG+GG    | 44.1 ± 16.6 (78)                 |          | 40.2 ± 13.3 (119) |          | 40.1 ± 14.2 (76)  |          |
| CLEAR  | SE       | 48.3 ± 13.6 (81)                 |          | 48.6 ± 12.4 (67)  |          | 47.1 ± 13.2 (18)  | 0.91     |
|        | CC       | 48.3 ± 10.3 (18)                 | 0.11     | 41.1 ± 11.3 (17)  | 0.52     | 46.7 ± 7.4 (5)    | 0.75     |
|        | CG       | 46.0 ± 13.4 (43)                 |          | 50.5 ± 12.0 (32)  |          | 45.1 ± 17.2 (11)  |          |

---

|       |                 |      |                 |     |                 |      |
|-------|-----------------|------|-----------------|-----|-----------------|------|
| GG    | 53.3± 12.8 (20) |      | 47.4± 13.6 (21) |     | 51.2± 11.4 (3)  |      |
| CC    | 48.3± 10.3 (18) | 0.82 | 46.1± 11.3 (17) | 0.4 | 49.7± 7.4 (5)   | 0.87 |
| CG+GG | 48.3± 13.4 (63) |      | 49.3± 12.6 (53) |     | 46.4± 15.9 (14) |      |

---
